# Supplementary material
Source: publisher site journal article supplement (https://www.dovepress.com/article/561443)
Supplement: Supplementary file 1 [file 561443%20Revised%20Supplementary%20Materials.docx]

**Supplementary materials**

**1.****[Exclusion](javascript:;) criteria**

(a) pregnant women with preexistent heart, liver, or renal diseases, and hypertension, diabetes, hypothyroidism, hyperthyroidism, or other metabolic and autoimmune diseases;

(b) hypothyroidism, hyperthyroidism or cholestasis during pregnancy, or other diseases complicated with pregnancy;

(c) multifetal pregnancies;

(d) assisted reproduction;

(e) fetal growth restriction, neonatal distress or pathological jaundice, pneumonia or other infections of newborns;

(f) apgar score for newborns is less than 7;

(g) newborn was diagnosed with genetic metabolic disease, severe birth defects and chromosomal aberrations.

**2. Inclusion Criteria for Subjects with Gestational Diabetes Mellitus**

Diagnostic Criteria for Gestational Diabetes Mellitus (GDM) by the American Diabetes Association (ADA)

The ADA has maintained a consistent core framework for GDM diagnosis in its 2025 guidelines, centered on the 75g oral glucose tolerance test (OGTT) while incorporating early screening for high-risk populations. The specific criteria are as follows:

Screening and Diagnosis for General Population (One-Step Method)

All pregnant women without a prior diagnosis of diabetes should undergo a 75g OGTT between 24 and 28 weeks of gestation. GDM is diagnosed if any one of the following blood glucose thresholds is met:

Fasting blood glucose ≥ 5.1 mmol/L;

1-hour post-glucose load blood glucose ≥ 10.0 mmol/L;

2-hour post-glucose load blood glucose ≥ 8.5 mmol/L.

Early Screening for High-Risk PopulationsPregnant women with high-risk factors (e.g., obesity, first-degree relative with type 2 diabetes, polycystic ovary syndrome, prior history of GDM) should undergo OGTT screening at their first prenatal visit. If the initial screening result is normal, a repeat 75g OGTT is recommended between 24 and 28 weeks of gestation to avoid missed diagnoses.

Exclusion of Preexisting (Overt) Diabetes in Pregnancy GDM is not diagnosed if screening reveals:

Fasting blood glucose ≥ 7.0 mmol/L; or

Random blood glucose ≥ 11.1 mmol/L at any time, accompanied by typical hyperglycemic symptoms (e.g., polydipsia, polyphagia, polyuria, unintended weight loss).

In such cases, further evaluation for preexisting (overt) diabetes in pregnancy is required to avoid misclassification and ensure appropriate clinical management.
